# Supplementary material for: NF-κB1 p50 stabilizes HIF-1α protein through suppression of ATG7-dependent autophagy
Source: PubMed Central journal article supplement (PMC9794792; doi:10.1038/s41419-022-05521-1), 2022-12-27

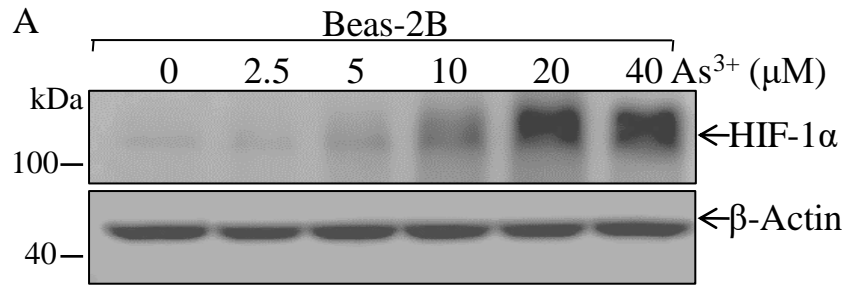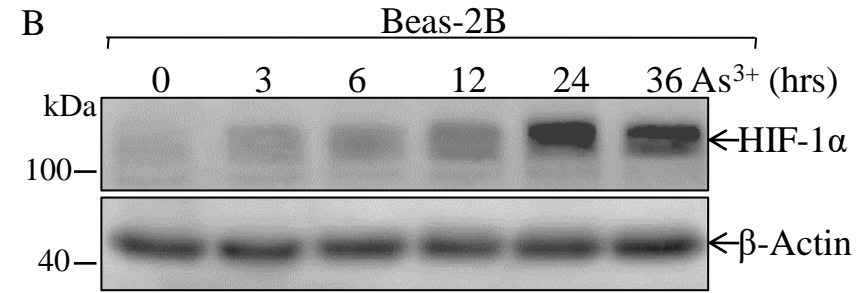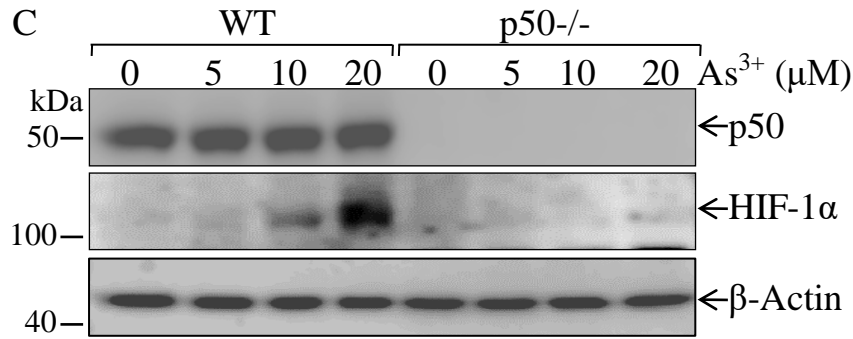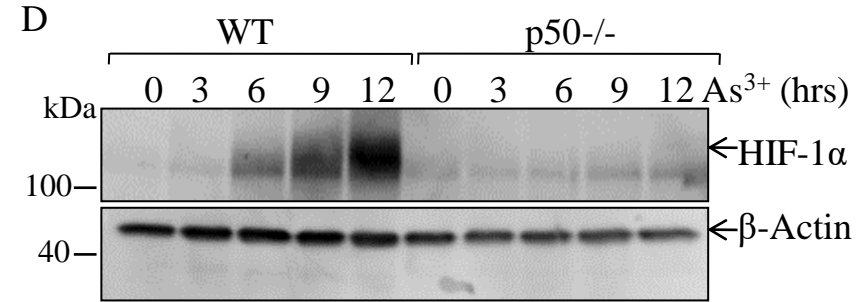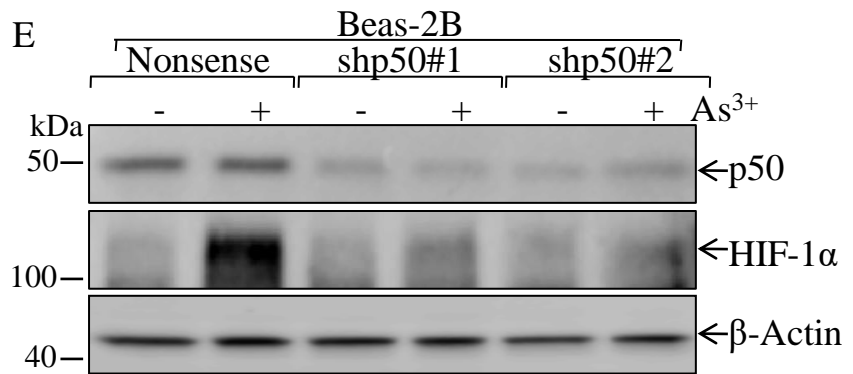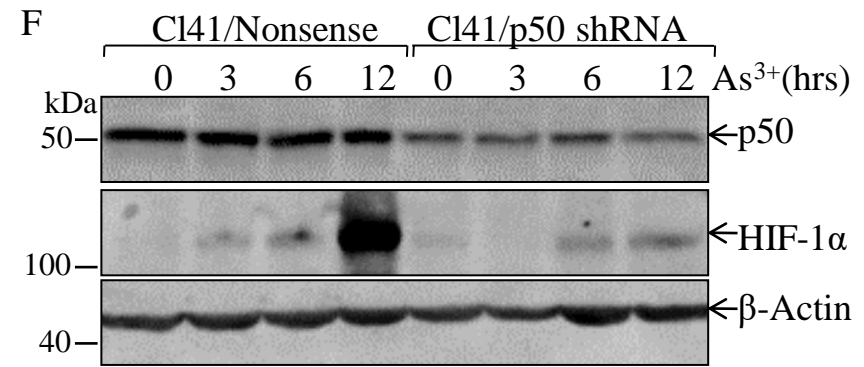

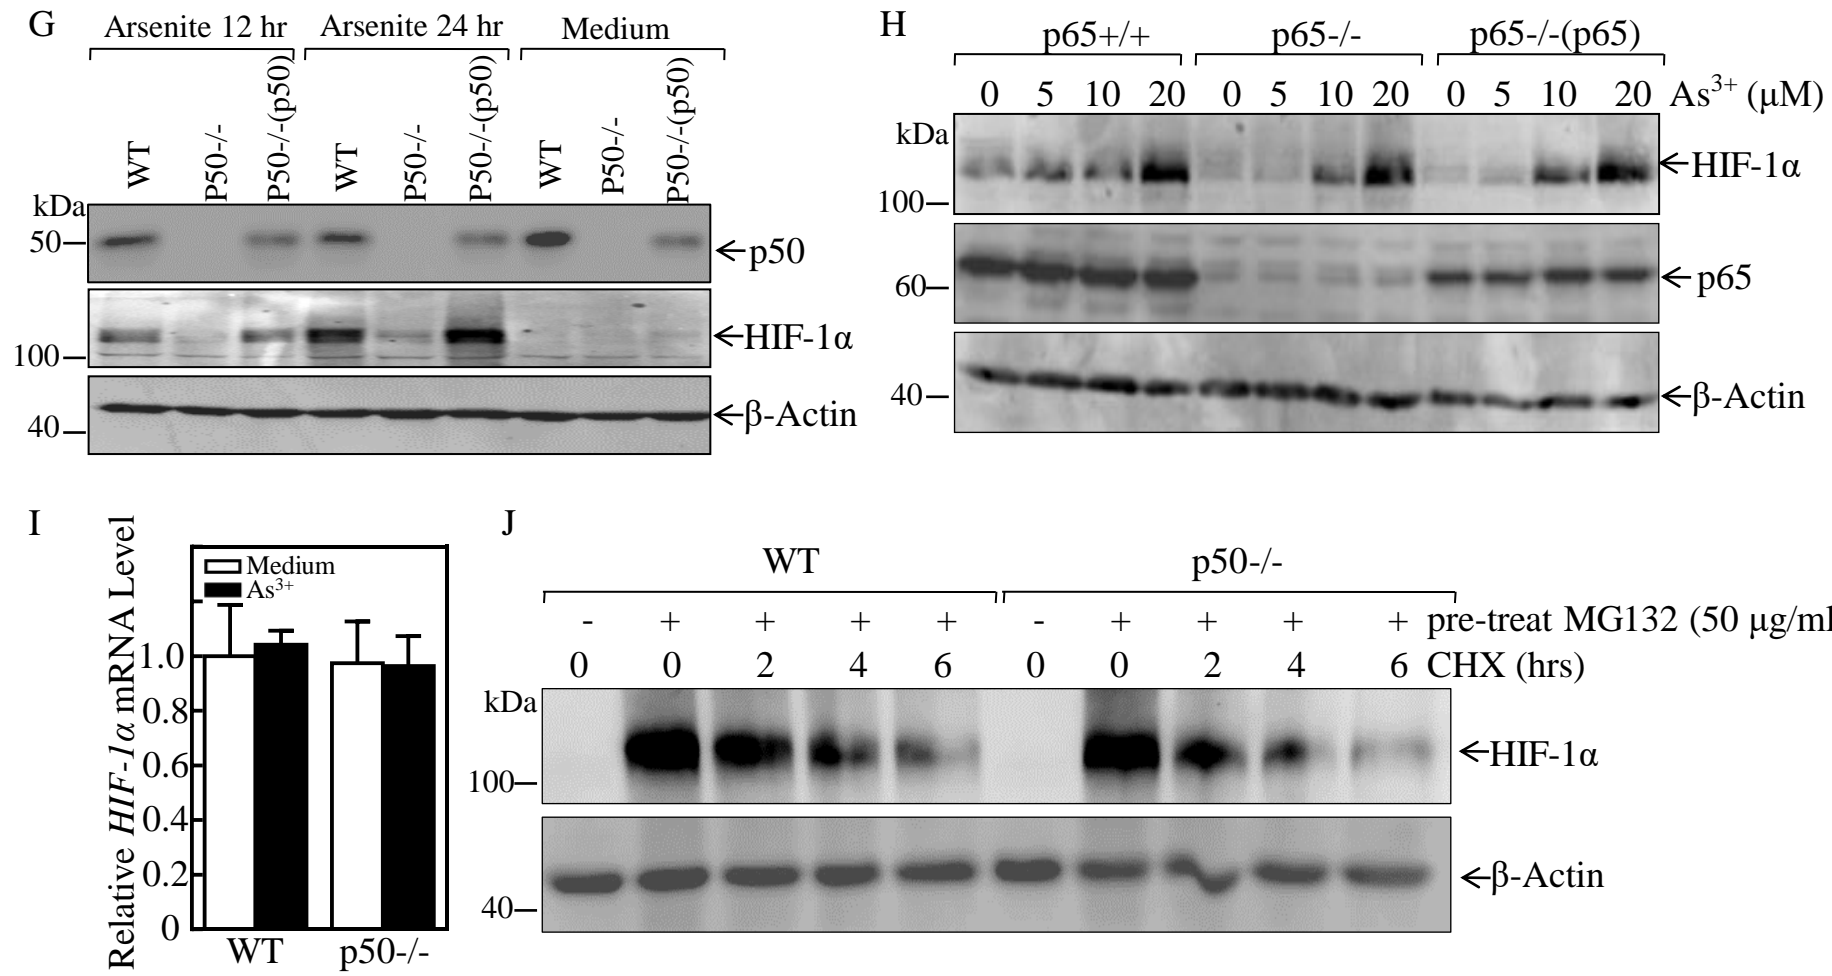

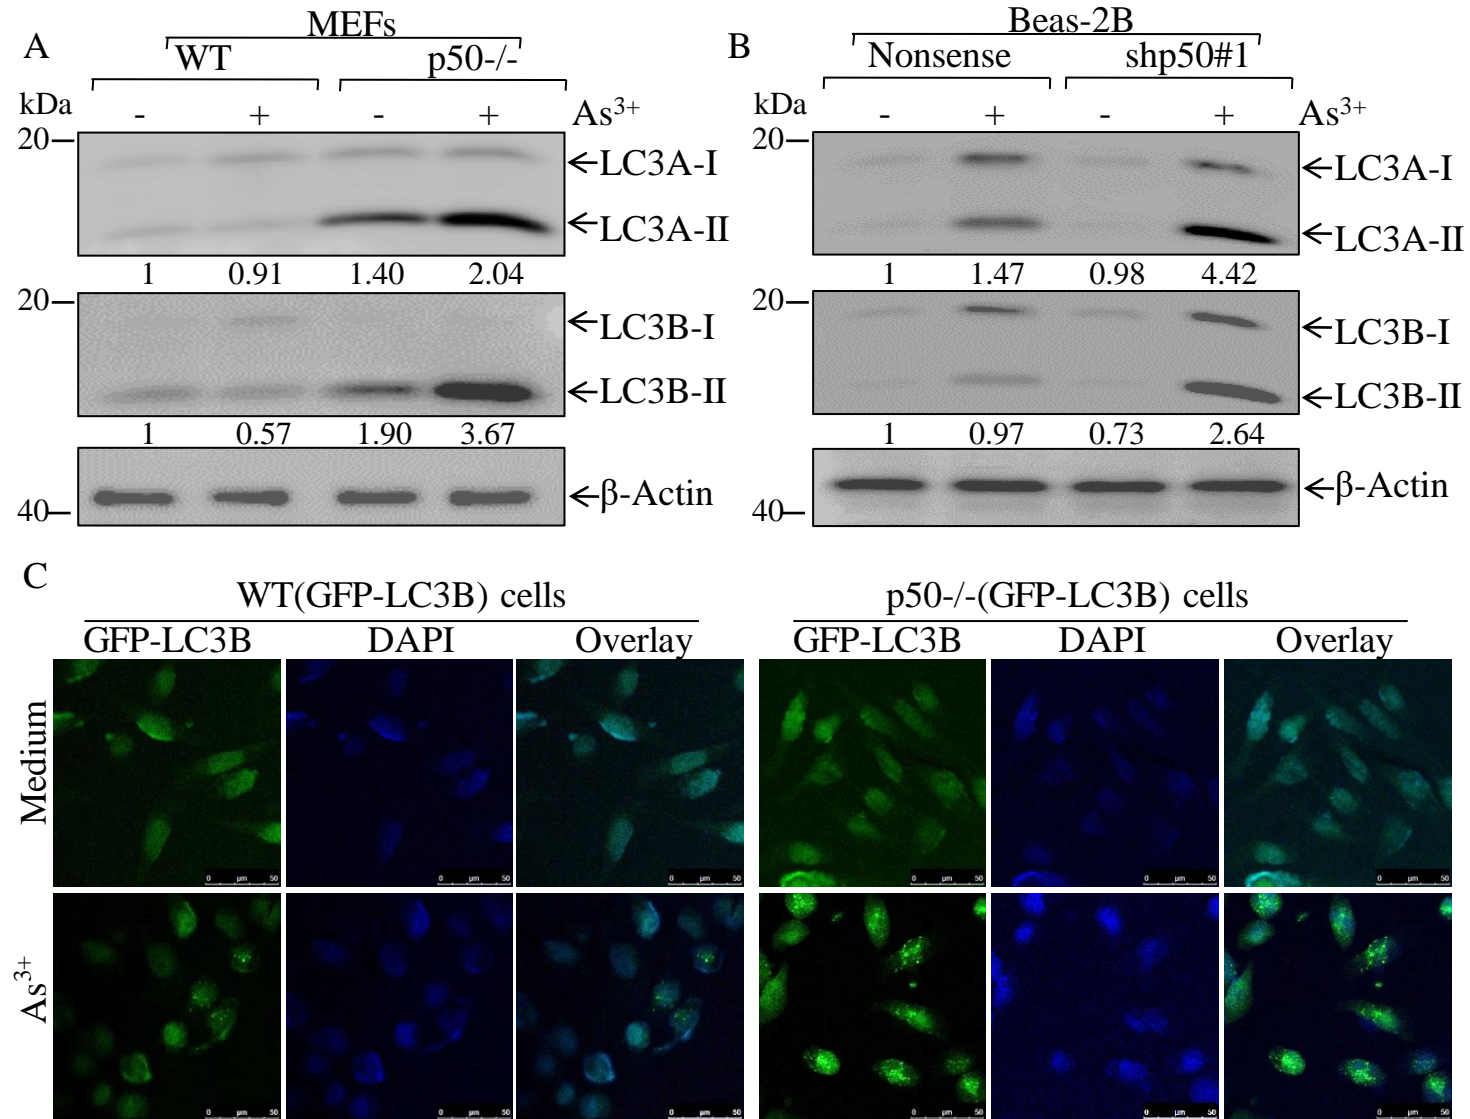

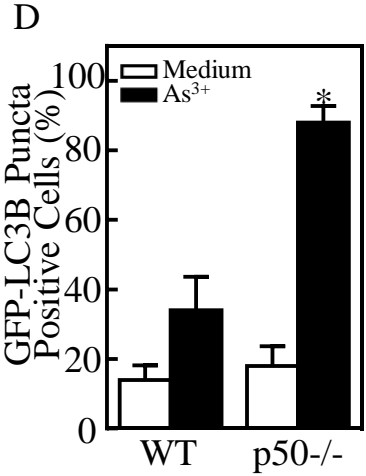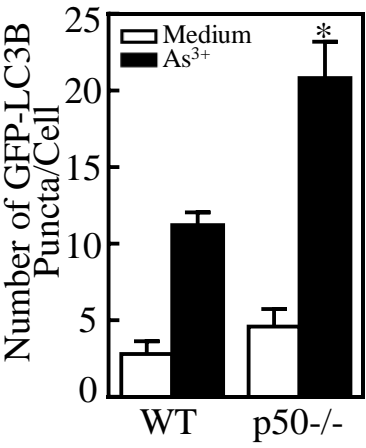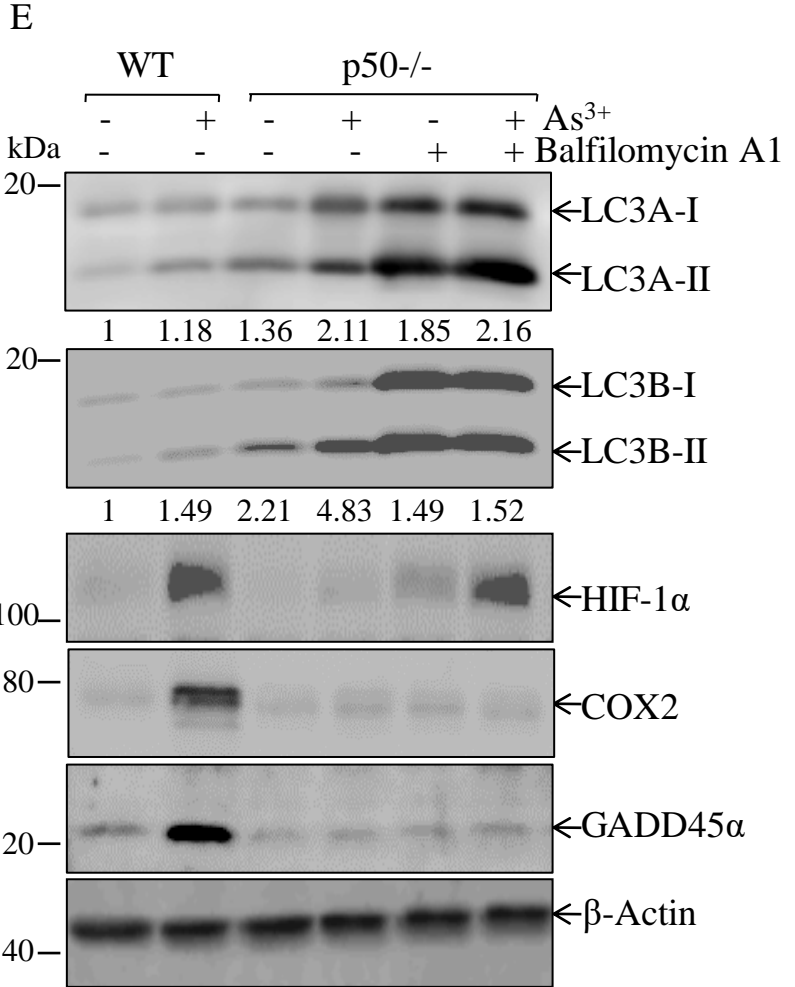

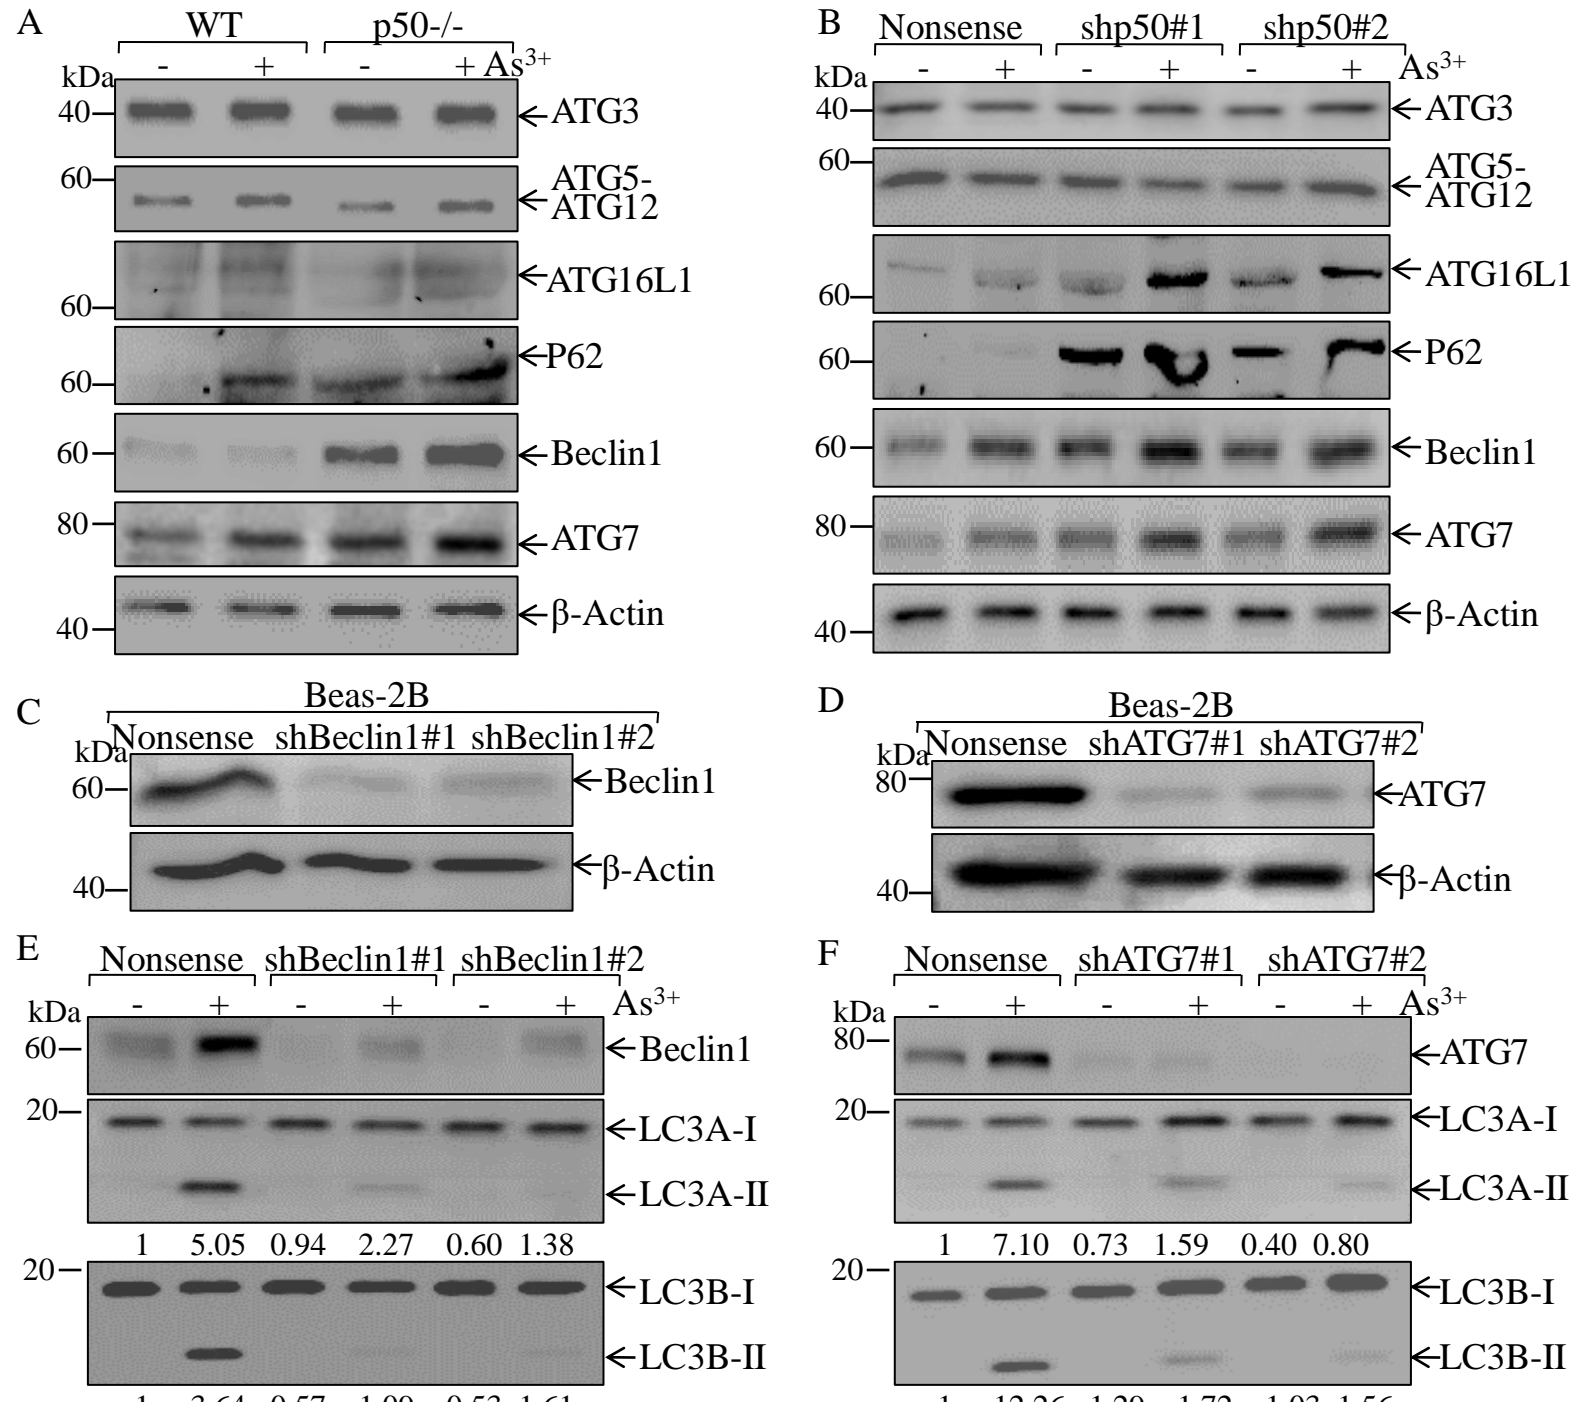

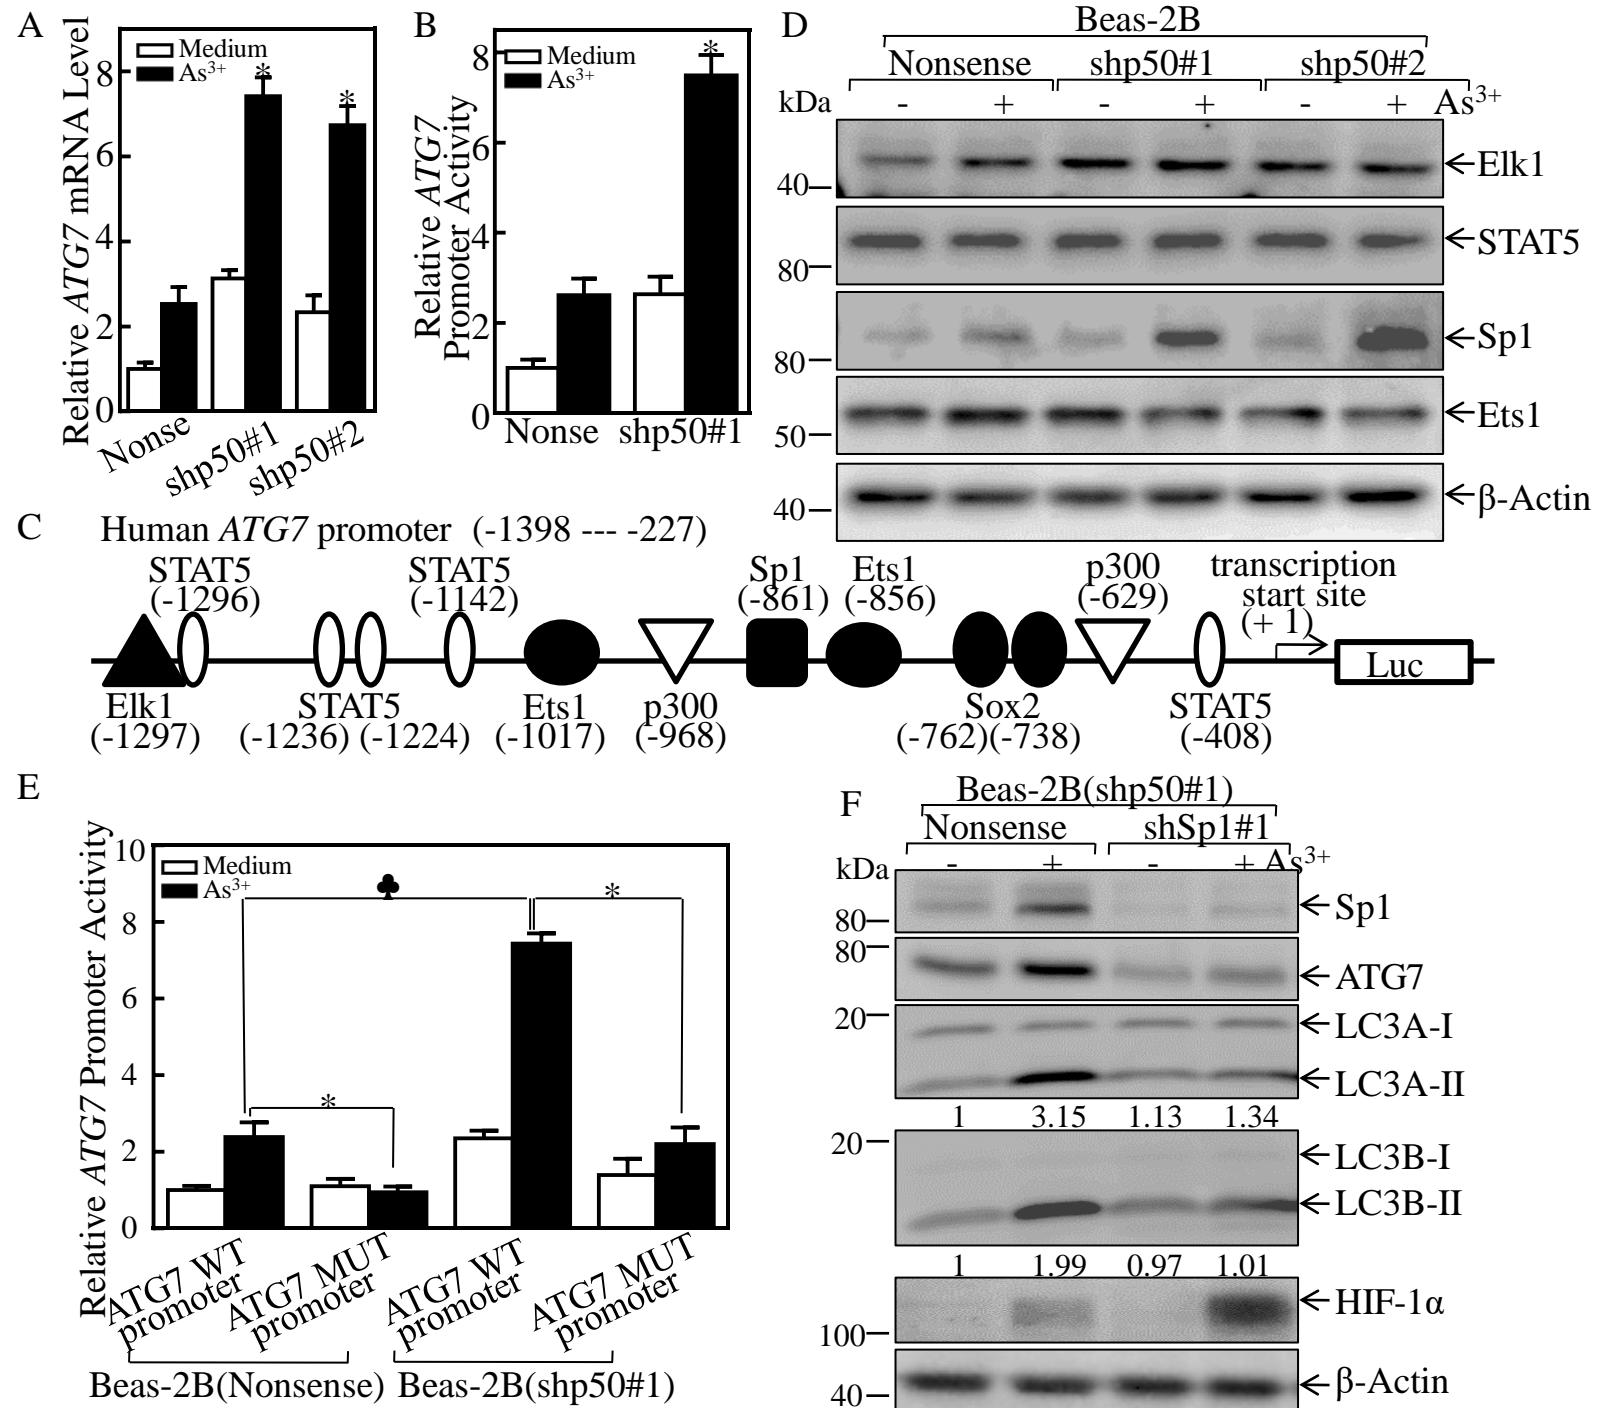

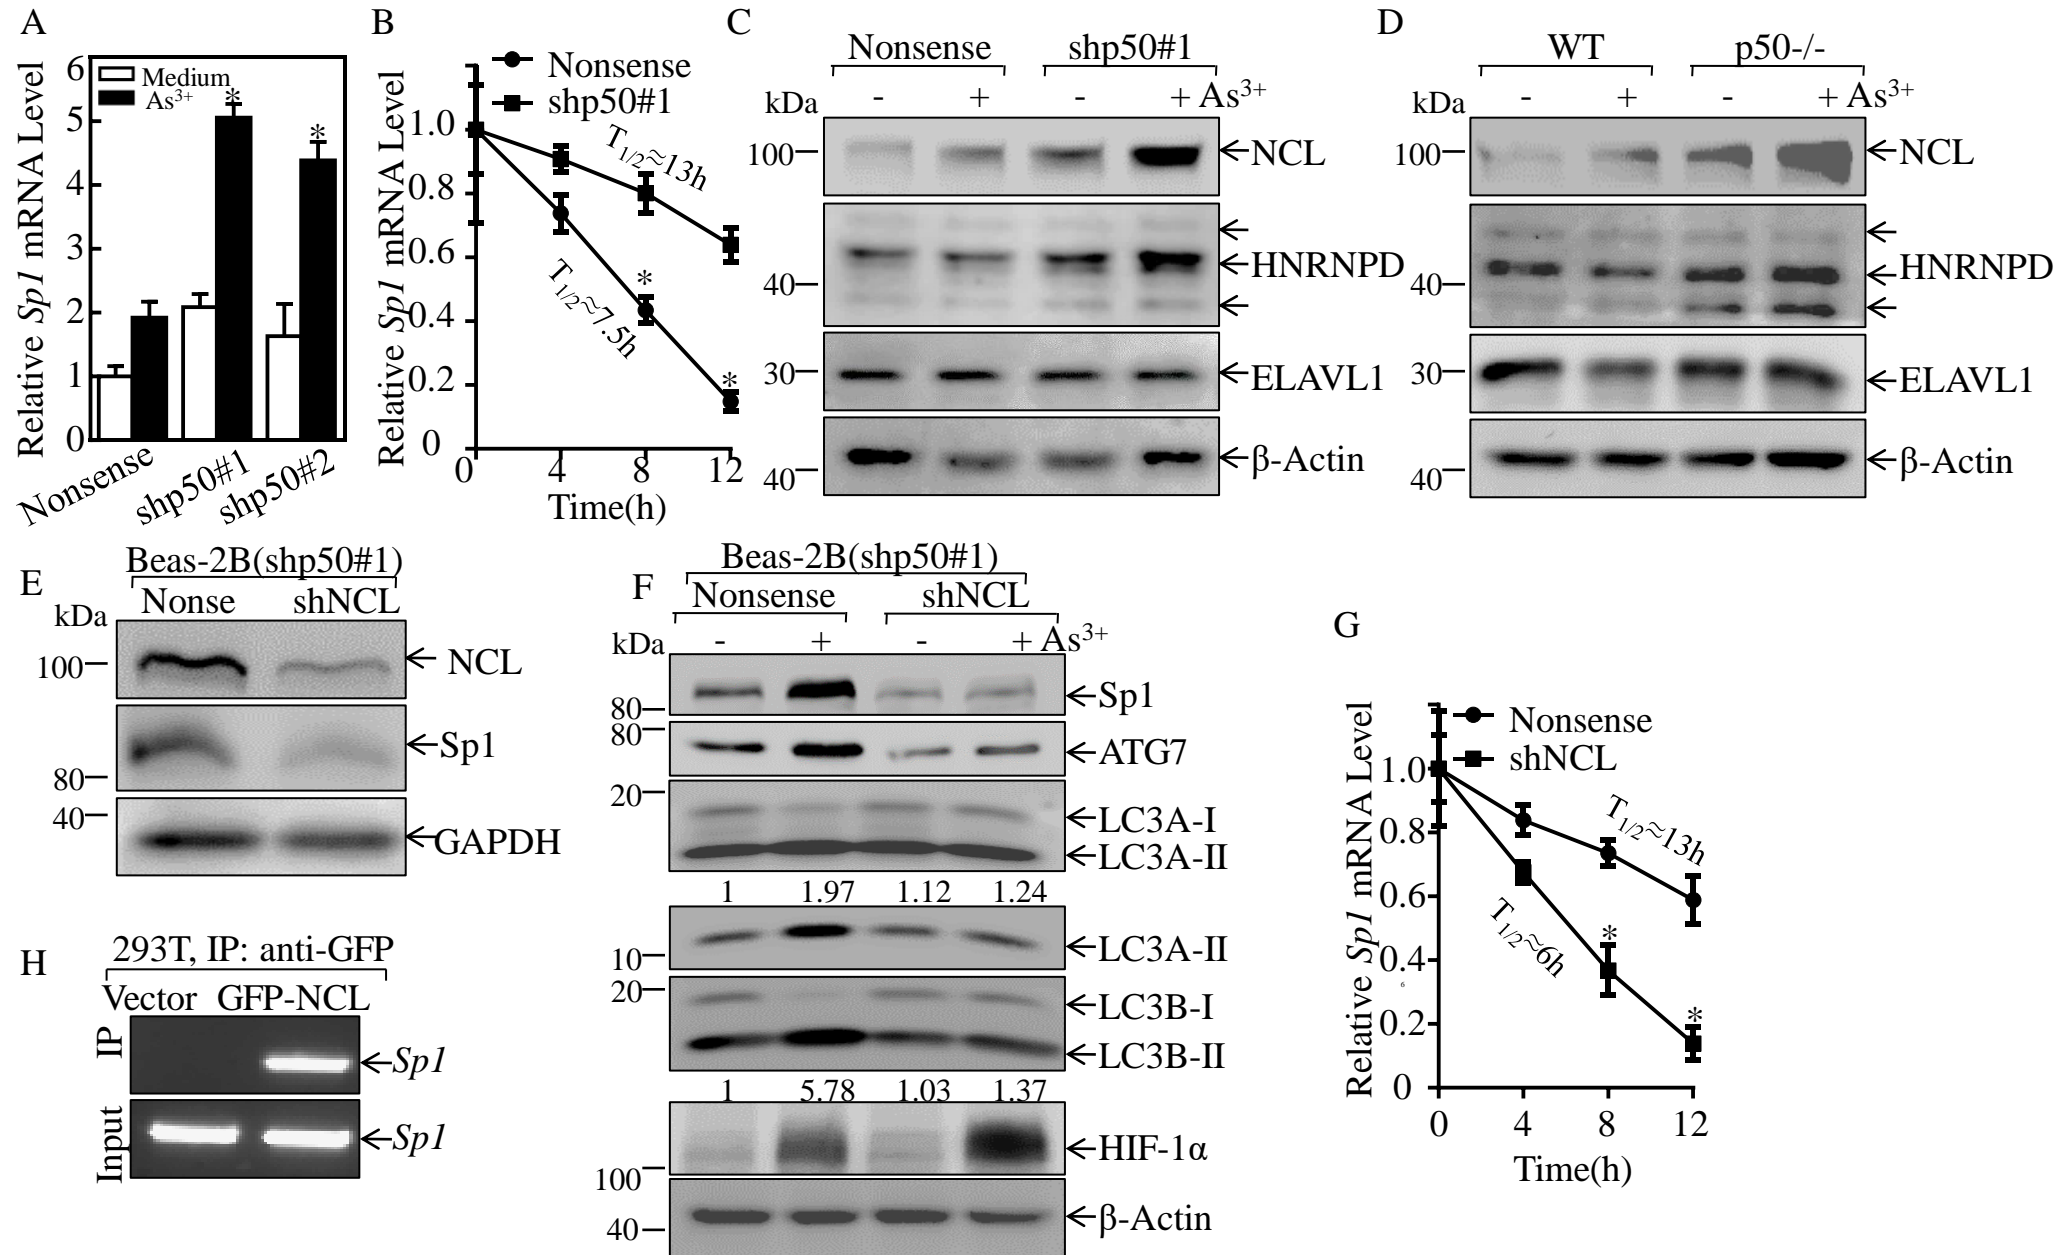

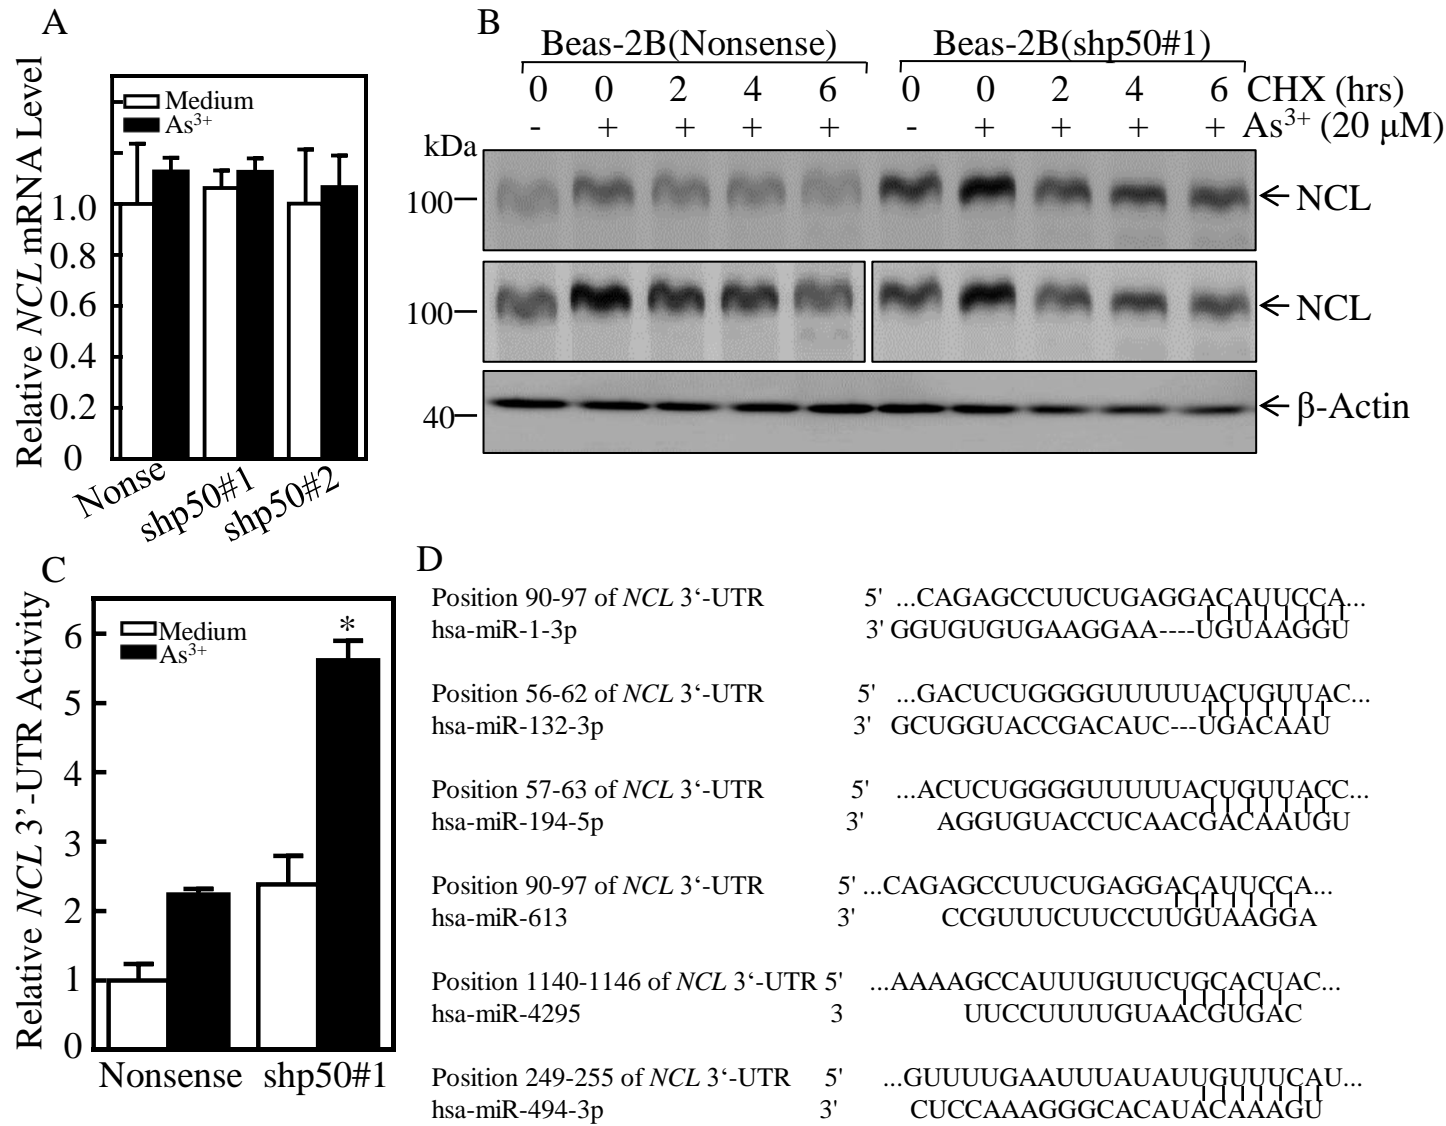



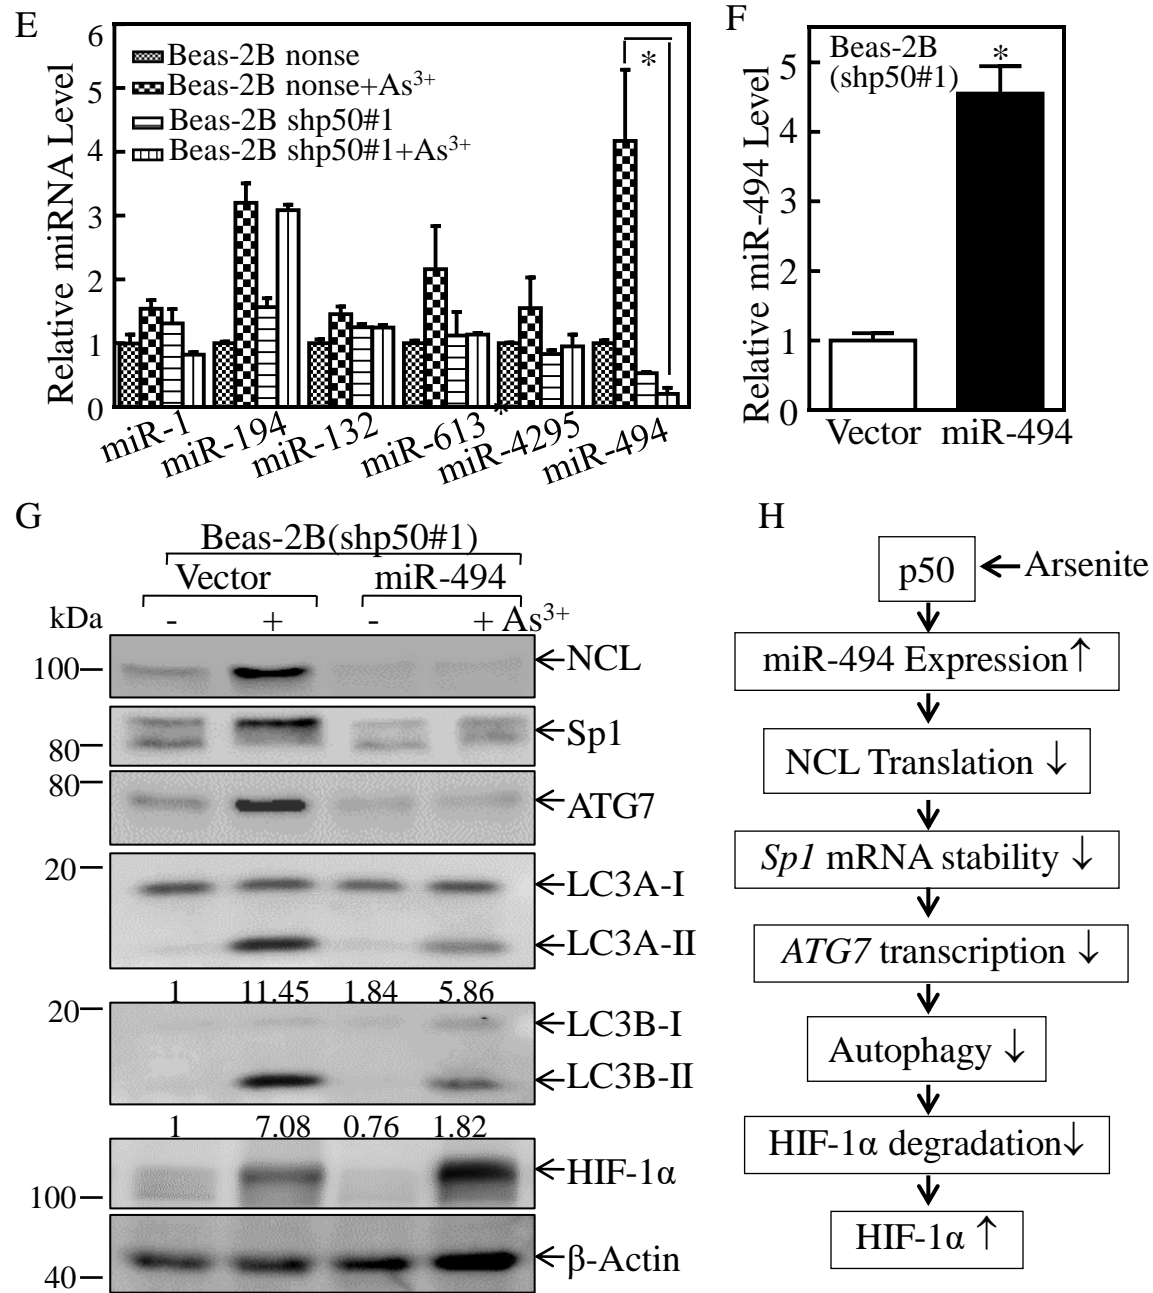

Supplement: 41419_2022_5521_MOESM2_ESM.pdf [file 41419_2022_5521_MOESM2_ESM.pdf]
